# Supplementary material for: The Newest Member of the Family of Chloralose: Synthesis of β‐Ribochloralose and Some Derivatives
Source: Hindawi journal article supplement (doi:10.1155/2013/748161), 2013-01-01
Supplement: f1 [file 748161.f1.pdf]

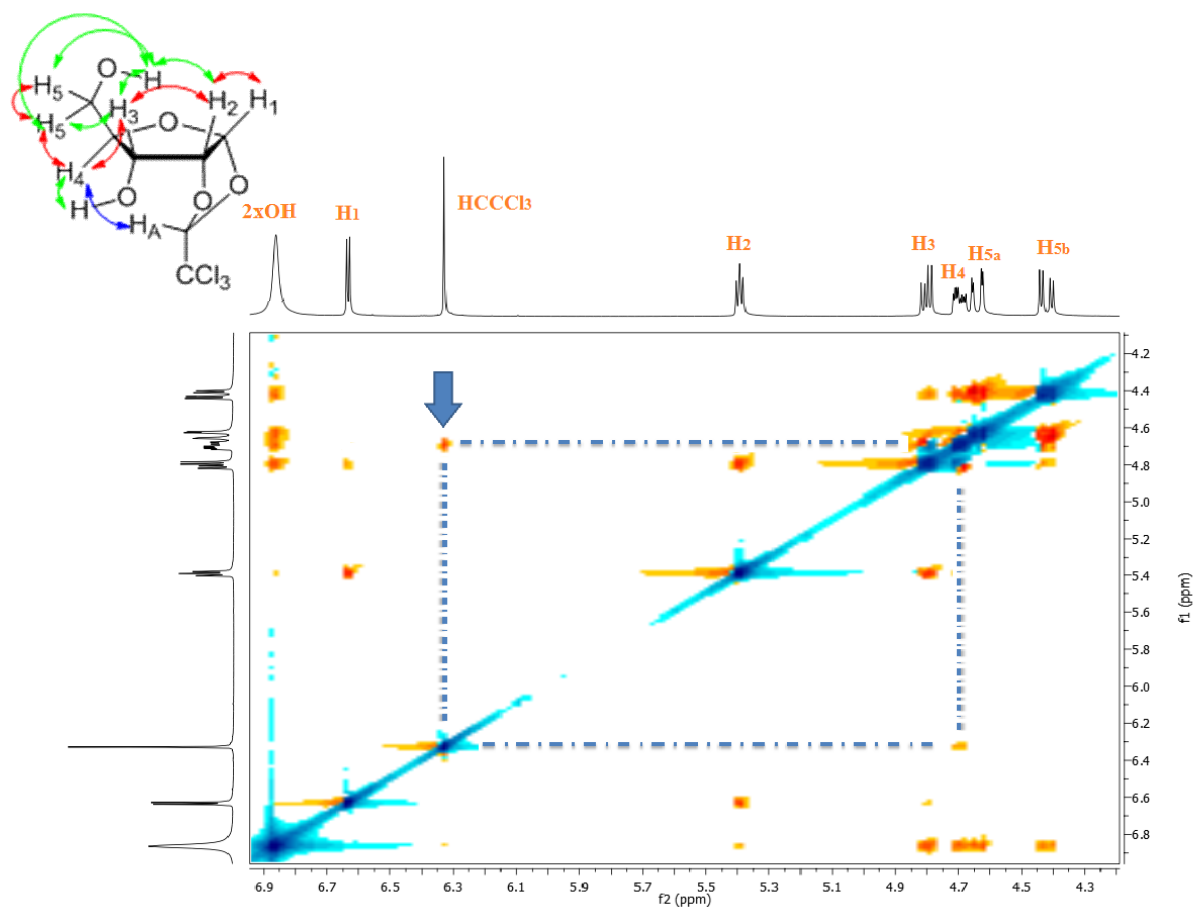

**Figure 1.** NOESY spectrum of 1,2-*O*-(*S*)-trichloroethylidene- $\alpha$ -D-ribofuranose (**1**) in  $C_5D_5N$

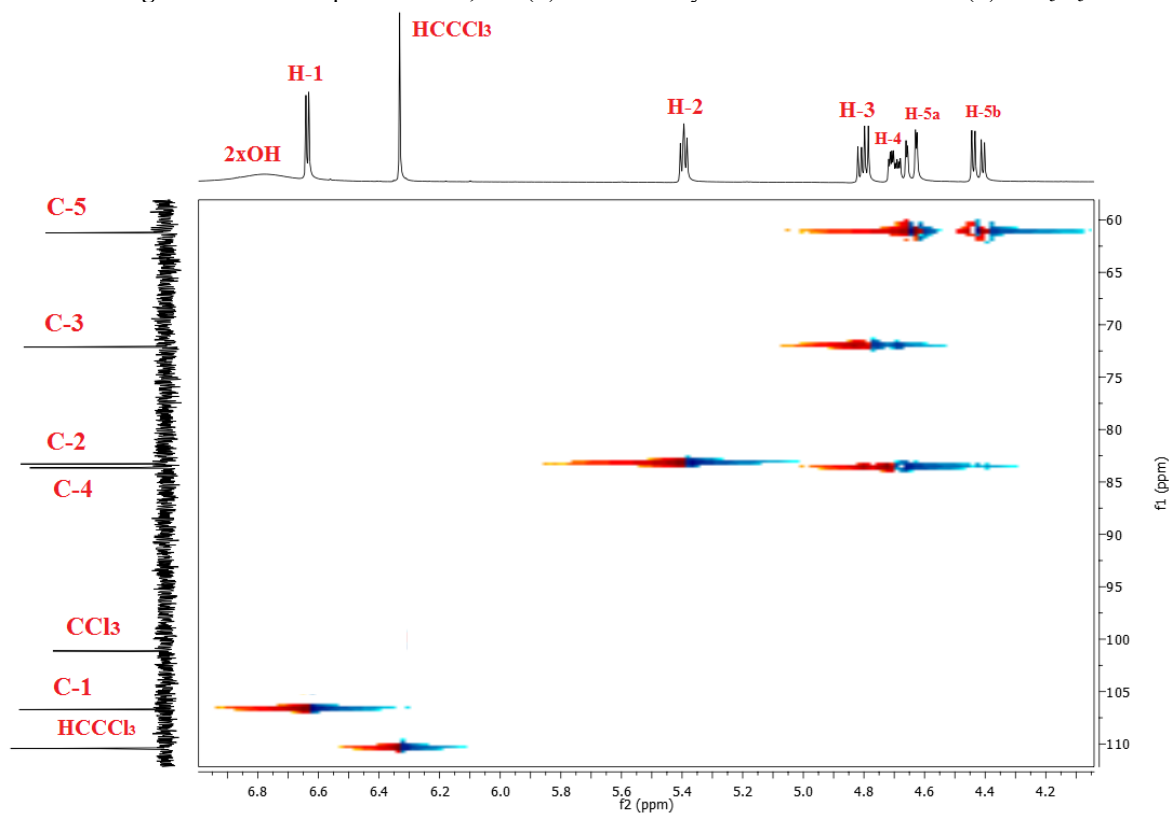

**Figure 2.** HMQC spectrum of 1,2-*O*-(*S*)-trichloroethylidene- $\alpha$ -D-ribofuranose (**1**) in  $C_5D_5N$

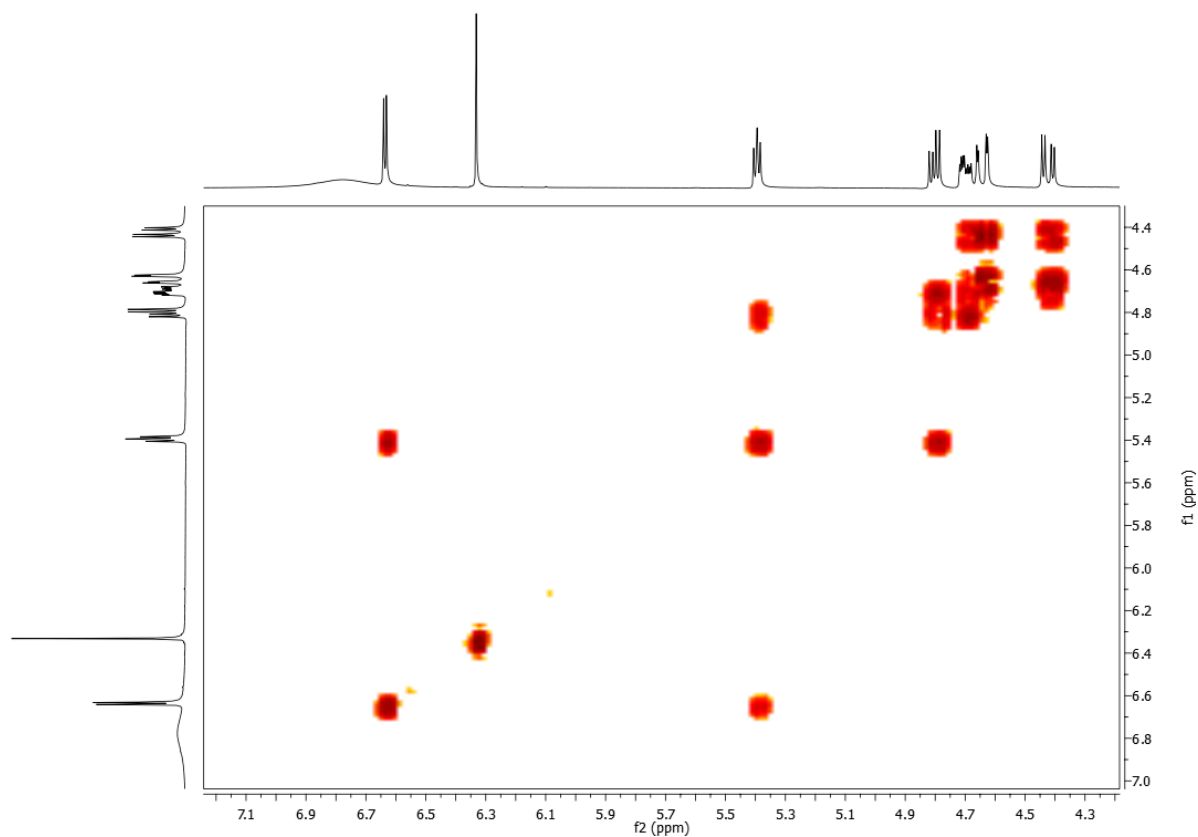

**Figure 3.** COSY spectrum of 1,2-*O*-(*S*)-trichloroethylidene- $\alpha$ -D-ribofuranose (**1**) in C<sub>5</sub>D<sub>5</sub>N

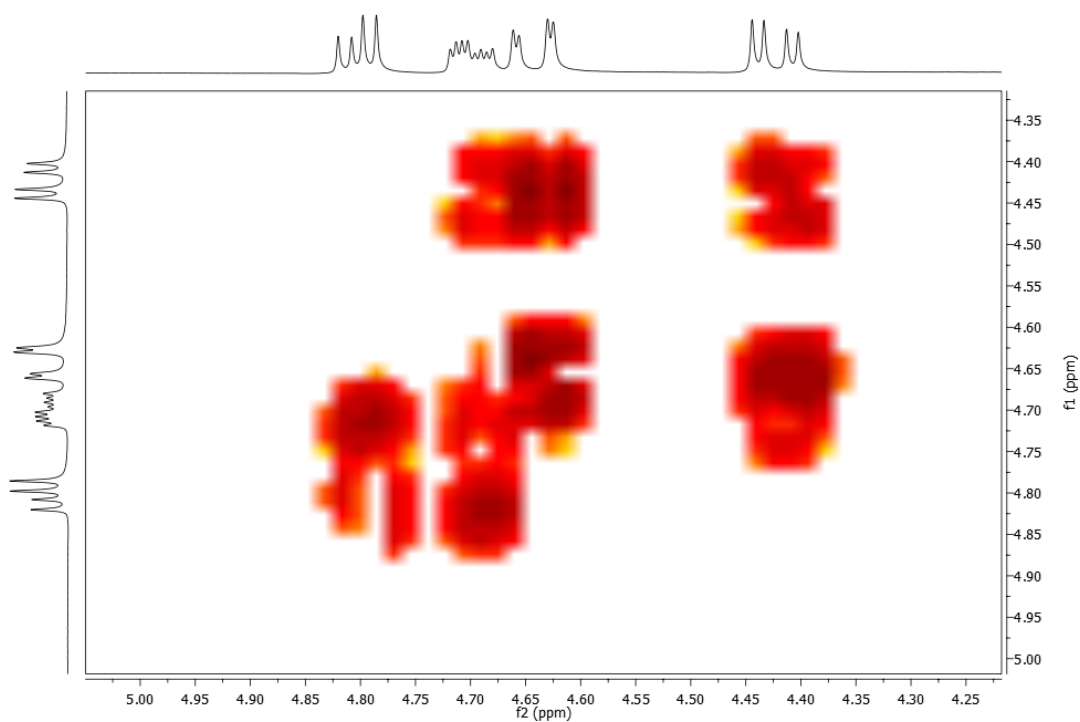

**Figure 4.** Expansion of COSY spectrum of 1,2-*O*-(*S*)-trichloroethylidene- $\alpha$ -D-ribofuranose (**1**) in C<sub>5</sub>D<sub>5</sub>N

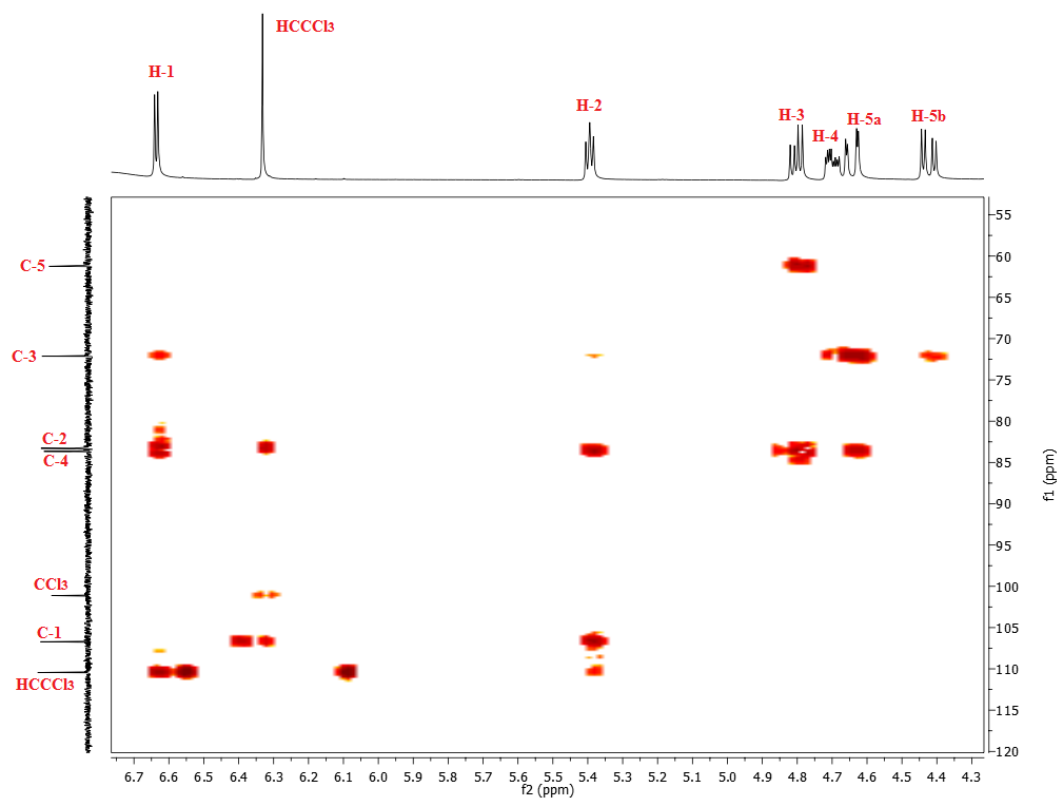

**Figure 5.** HMBC spectrum of 1,2-*O*-(*S*)-trichloroethylidene- $\alpha$ -D-ribofuranose (**1**) in C<sub>5</sub>D<sub>5</sub>N

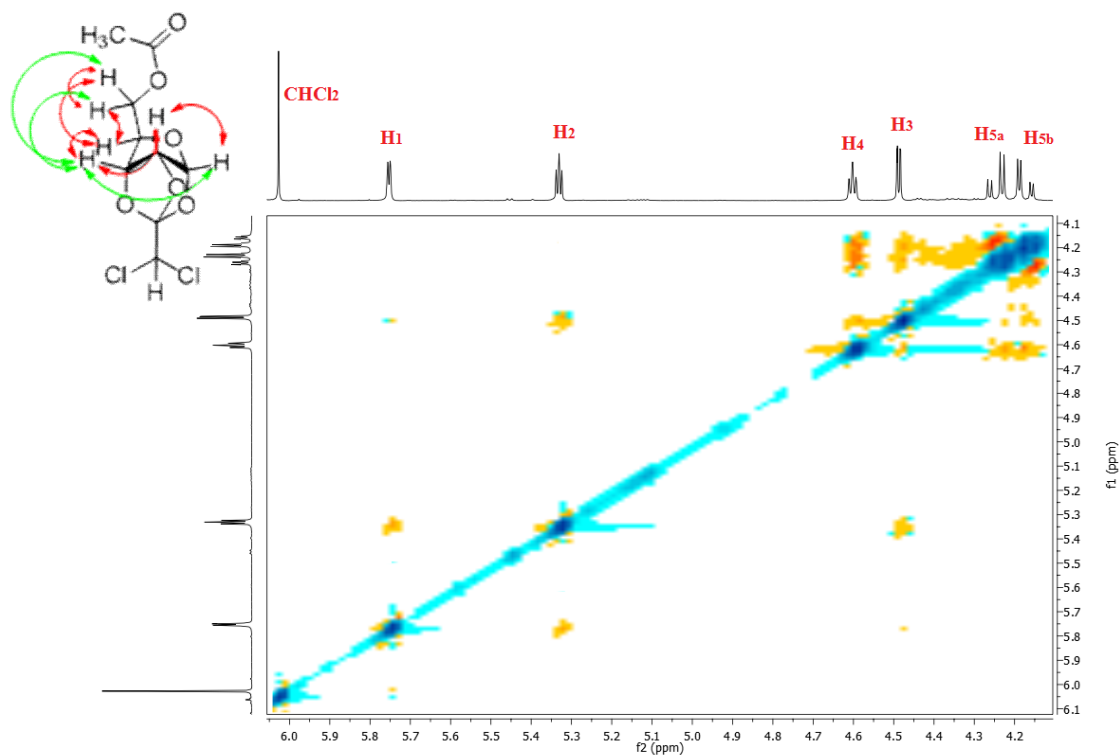

**Figure 6.** NOESY spectrum of 5-*O*-acetyl-1,2,3-*O*-orthodichloroacetyl- $\alpha$ -D-ribofuranose (**4**) in  $\text{CDCl}_3$

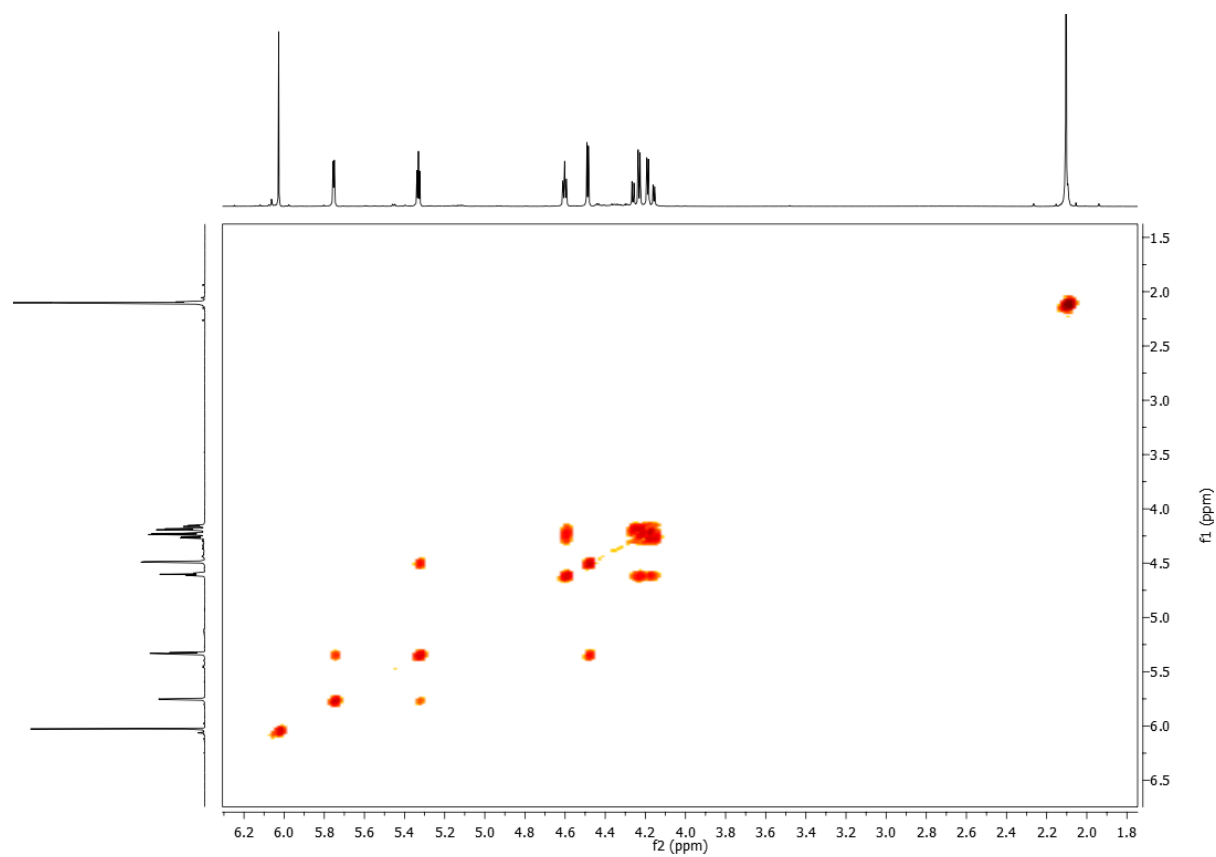

**Figure 7.** COSY spectrum of 5-*O*-acetyl-1,2,3-*O*-orthodichloroacetyl- $\alpha$ -D-ribofuranose (**4**) in  $\text{CDCl}_3$

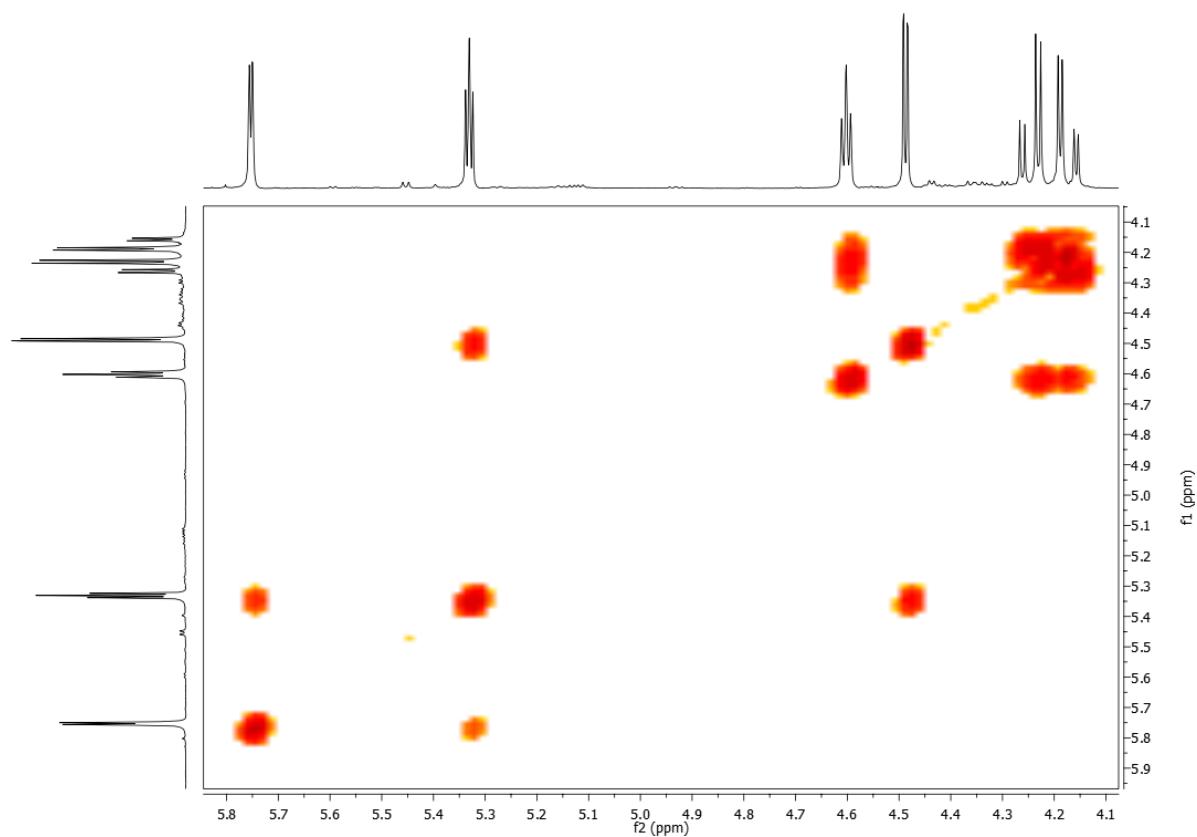

**Figure 8.** Expansion of COSY spectrum of 5-*O*-acetyl-1,2,3-*O*-orthodichloroacetyl- $\alpha$ -D-ribofuranose (**4**) in CDCl<sub>3</sub>

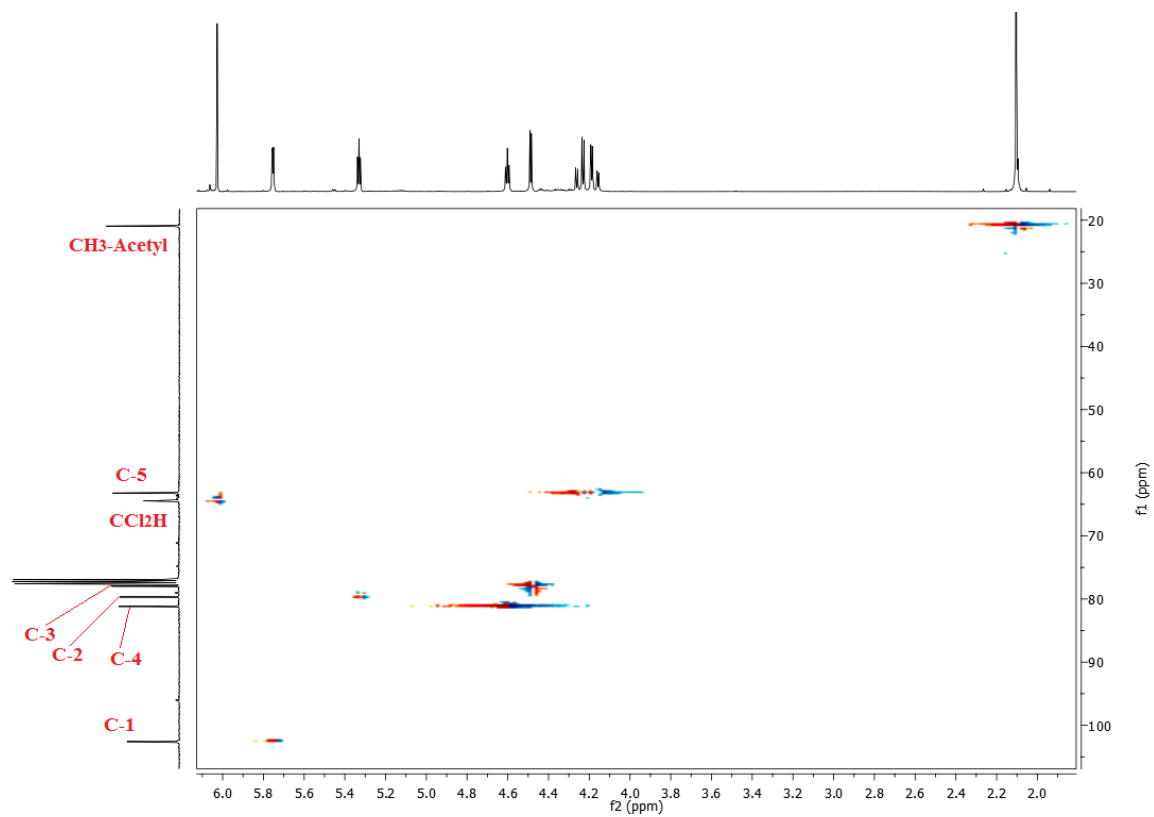

**Figure 9.** HMQC spectrum of 5-*O*-acetyl-1,2,3-*O*-orthodichloroacetyl- $\alpha$ -D-ribofuranose (**4**) in CDCl<sub>3</sub>
